# Supplementary material
Source: PubMed Central journal article supplement (PMC4963248)
Supplement: NIHMS801381-supplement-Supp_Info.pdf [file NIHMS801381-supplement-Supp_Info.pdf]

**Essentiality of threonylcarbamoyladenine (t<sup>6</sup>A), a universal tRNA modification, in bacteria**

Patrick C. Thiaville<sup>1,2,3,4§</sup>, Basma El Yacoubi<sup>1§</sup>, Caroline Köhrer<sup>5</sup>, Jennifer J. Thiaville<sup>1</sup>, Chris Deutsch<sup>6</sup>, Dirk Iwata-Reuyl<sup>6</sup>, Jo Marie Bacusmo<sup>1</sup>, Jean Armengaud<sup>7</sup>, Yoshitaka Bessho<sup>8,9</sup>, Collin Wetzel<sup>10</sup>, Xiaoyu Cao<sup>10</sup>, Patrick A. Limbach<sup>10</sup>, Uttam L. RajBhandary<sup>5</sup>, and Valérie de Crécy-Lagard<sup>1,3\*</sup>

<sup>1</sup>Department of Microbiology and Cell Science, University of Florida, Gainesville, FL 32611, USA

<sup>2</sup>Genetics and Genomics Graduate Program, University of Florida, Gainesville, FL 32610, USA

<sup>3</sup>University of Florida Genetics Institute, University of Florida, Gainesville, FL 32610, USA

<sup>4</sup>Institut de Génétique et Microbiologie, Université of Paris-Sud, Orsay, France

<sup>5</sup>Department of Biology, Massachusetts Institute of Technology, Cambridge, Massachusetts 02139, USA

<sup>6</sup>Department of Chemistry, Portland State University, Portland, Oregon, 97297, USA

<sup>7</sup>CEA, DSV, IBiTec-S, SPI, Li2D, Laboratory "Innovative technologies for Detection and Diagnostics", Bagnols-sur-Cèze, F-30200, France

<sup>8</sup>RIKEN SPring-8 Center, 1-1-1 Kouto, Sayo, Hyogo 679-5148, Japan

<sup>9</sup>Institute of Physics, Academia Sinica, 128 Sec. 2, Academia Rd., Nankang, Taipei 11529, Taiwan

<sup>10</sup>Rieveschl Laboratories for Mass Spectrometry, Department of Chemistry, University of Cincinnati, Cincinnati, Ohio 45221, United States

\*To whom correspondence should be addressed. Valérie de Crécy-Lagard, Department of Microbiology and Cell Science, University of Florida, P.O. Box 110700, Gainesville, FL 32611-0700; E-mail : [vcrcy@ufl.edu](mailto:vcrcy@ufl.edu), Tel: (352) 392 9416; Fax: (352) 392 5922

<sup>§</sup>Contributed equally.

Running title: t<sup>6</sup>A essentiality

## Supplemental Results

### *Sequencing of E. coli derivatives*

To further validate our genetic dissection experiments, the P<sub>TET</sub>::*tsaD* (VDC7062) and P<sub>TET</sub>::*tsaC* (VDC7066) strains as well as their parental strain *E. coli* B were fully sequenced to identify point mutations as described below. The reference genome closest to *E. coli* B is *E. coli* B Strain REL606. *E. coli* B is a direct descendant of *Bacillus coli* used by d'Herelle in 1918 and was first described by Luria in 1945. REL606 is derived from B but with 45 years of additional manipulations and was first described by Lenski in 1985 (Daegelen *et al.*, 2009). This would explain the 528 variations (single nucleotide polymorphisms (SNPs), insertions or deletions), we found between B and REL606 (Dataset 1). Although the P<sub>TET</sub>::*tsaD* (VDC7062) and P<sub>TET</sub>::*tsaC* (VDC7066) have mostly the same sequence as the B strain, a few SNPs found in REL606 compared to B, are also found in the these two strains, all in phage or hypothetical proteins. In addition, P<sub>TET</sub>::*tsaD* (VDC7062) and P<sub>TET</sub>::*tsaC* (VDC7066) each contained additional mutations (54 and 305, respectively) and most of these could be traced back to the 90 kb window from P1 transduction from the donor BW25113 strains.

A few mutations unique to the two strains were found. As predicted, the P<sub>TET</sub>::*tsaC* (VDC7066) *tetR* allele of the P<sub>TET</sub> cassette contains a T1173G change, creating a non-synonymous Q38P mutation, in the TetR DNA binding site. In addition, a C84G mutation that leads to a D28E change of the cold shock protein CspC protein (ECB\_01793) was identified. Loss of CspC function has been shown to confer a competitive fitness advantage over isogenic wild-type strains (Rath & Jawali, 2006). The D28E change occurs adjacent to the RNA binding domain of CspC.

P<sub>TET</sub>::*tsaD* (VDC7062) contains three unique variations: a deletion (T11-) in a

hypothetical protein not predicted in the RefSeq, a silent A2838G mutation in RshA (ECB\_03448), and a A1810C mutation leading to the T605P mutation in YhfK (ECB\_03209, conserved hypothetical inner membrane protein).

#### *t<sup>6</sup>A essentiality suppression tests*

The P<sub>TET</sub>::*tsaC* and P<sub>TET</sub>::*tsaD* strains (VDC5684 and VDC5801, respectively) were transformed with plasmids carrying *ileS* from yeast (pBY324.10) or *Bacillus subtilis* (pBY326.6) alone or in combination with a compatible plasmid carrying *Mycoplasma mobile* tRNA<sup>Ile3</sup><sub>UAU</sub> and *ileS* gene pair (pPCT080) (*Mm-Pair*). Transformants were selected in absence of aTc and in the presence or absence of inducer for expression of IleRS transgenes. None of the transformants displayed growth in the absence of aTc (Figure S3). As in Figure 4B, the complementing P<sub>BAD</sub>::*tsaC* plasmid allows for growth of the P<sub>TET</sub>::*tsaC* strain when neither inducer is used (Figure S3B), but, in repeated attempts, the addition of arabinose inducing expression of P<sub>BAD</sub>::*tsaC* was toxic in combination with the constitutive expression of the *Mm-Pair* (Figure S3B). As noted by Bohlke and Budisa, expression of the *Mm-Pair* causes a growth defect in *E. coli*, possibly due to the misreading of AUG codons by the *Mm-Pair* (Bohlke & Budisa, 2014). It seems that high levels of t<sup>6</sup>A modified tRNAs is incompatible with the *Mm-Pair*.

#### *Analyses of codon choice and codon stretches in proteins that are downregulated in the D. radiodurans t<sup>6</sup>A<sup>-</sup> strain*

Only two amino acids are encoded by both t<sup>6</sup>A dependent and t<sup>6</sup>A independent codons, Ser and Arg. tRNA<sup>Arg</sup><sub>CCU</sub> and tRNA<sup>Arg</sup><sub>UCU</sub> read AGG and AGA codons, respectively, and contain t<sup>6</sup>A, whereas tRNA<sup>Arg</sup><sub>ACG</sub> and tRNA<sup>Arg</sup><sub>CCG</sub> that decode CGN codons do not (Jühling *et al.*, 2009). For tRNA<sup>Ser</sup><sub>GCU</sub> that decodes AGY, it depends on the organism: t<sup>6</sup>A is found at position 37 in *E.*

*coli*, whereas  $t^6A$  is found in yeast (Jühling *et al.*, 2009).  $tRNA^{Ser}_{GGA}$ ,  $tRNA^{Ser}_{CGA}$ , and  $tRNA^{Ser}_{UGA}$  that decode UCN never contain  $t^6A$  (Jühling *et al.*, 2009). MS/MS analysis of *D. radiodurans* and *T. thermophilus* bulk tRNA confirmed that  $t^6A$  is present at position 37 of  $tRNA^{Ser}_{GCU}$  (data not shown). Proteins that exclusively use the  $t^6A$  dependent Ser codons (AGY) or Arg codons (AGR) were compiled (Table S6 and S7 respectively). Four of these proteins were significantly reduced in the  $t^6A^-$  strain: DR\_0265 (a regulator of N-acetyl glucosamine utilization), DR\_0548 (Type IV pilin PilA), DR\_0312 [(LSU ribosomal protein L4p (L1e)] and the tyrosine degradation protein DR\_1609 (predicted 2-keto-4-pentenoate hydratase/2-oxohepta-3-ene-1,7-dioic acid hydratase) (Table S4 and S5).

The percentage of  $t^6A$  codons in stretches of two or more is in average 2.0% per protein for the whole theoretical proteome (Table S8) and 2.8% for both the mid and late-log detected proteome (Table S4 and S5). The average for the proteins that are down regulated is 3.4% for mid-log and 3.0% for late-log experiments (Table S4 and S5). The averages for proteins that are up-regulated are 3.0% for both mid and late-log experiments (Table S4 and S5). This suggests that at least for the mid-log experiments, down-regulated proteins show an enrichment of  $t^6A$  dependent codon stretches. Finally, proteins with the longest stretches of  $t^6A$  codons were ranked and 23 proteins were found to have stretches of  $t^6A$  codons longer or equal to seven (Table S8), of these two have significantly lower expression levels in the  $t^6A$  deficient strain (Table S4 and S5): DR\_1046 (ClpB protein) and DR\_2263 [(non-specific DNA-binding protein Dps/Iron-binding ferritin-like antioxidant protein/Ferroxidase (EC 1.16.3.1)].

## Supplemental methods

### *Genomic DNA preparation*

*E. coli* DNA was purified using the Qiagen DNeasy Blood and Tissue Kit following the manufacturer's instruction for isolation of DNA from gram negative bacteria. DNA from *S. mutans* was purified using the following protocol: five mL of cultures grown overnight, standing at 37 °C with 5% CO<sub>2</sub> was washed once with TE (pH 8.0) and suspended in 250 µL of TE and then heated at 60 °C for 20 minutes. Cells were chilled on ice, and then five µL of mutanolysin (Sigma, 5000 U/mL) and 10 µL of lysozyme (100 mg/mL) were added and incubated at 37 °C for 60 minutes. 2.5 µL of proteinase K (10 mg/mL stock solution) was added and incubation continued for 60 minutes at 37 °C with rotation. Next, 1.0 µL of RNaseA (Qiagen 100 mg/mL) and 75 µL of 10% SDS were added, and the tubes were gently inverted. 7.3 µL of 4M NaCl<sub>2</sub> was added and mixed, followed by 41 µL of 0.1M NaCl<sub>2</sub> / 10% CTAB. Samples were vortexed vigorously, and incubated at 65 °C for 20 minutes, prior to extraction with 450 µL chloroform:isoamyl alcohol (24:1). Tubes were centrifuged for seven minutes at top speed in microcentrifuge. The aqueous layer was extracted two more times with an equal volume of phenol:chloroform:isoamyl (1:1) and then with a volume of chloroform:isoamyl. The aqueous layer was subjected to ethanol precipitation with two volumes of ice-cold 95% ethanol and centrifuge for 10 minutes at top speed in microcentrifuge. Pellets were washed with 70% ETOH. The dried DNA were suspended in 100 µL TE. DNA quality was analyzed using Picogreen (Thermo) and Nanodrop.

### *Whole genome sequencing*

Sequencing of genomic DNA from *S. mutans* and *E. coli* was performed by Beckman Genomics (Danvers, MA). Libraries were constructed using the Illumina TruSeq Paired End

adaptors and Beckman Coulter SPRI works Library Construction using SPRI-TE instrumentation. All libraries passed QC for library size and concentration (>2nM). Libraries were sequenced on an Illumina HiSeq 2500 instrument at 2 x 100 bp using V4 chemistry. Quality of the sequencing run was determined using FastQC ([www.bioinformatics.babraham.ac.uk/projects/fastqc/](http://www.bioinformatics.babraham.ac.uk/projects/fastqc/)). Reads were processed using Illumina's bcl2fastq version 1.8.4 and fastq\_illumina\_filter-0.1. Fastq format validation and statistic reporting was done by the fastq\_illumina\_filter. Read alignment and SNP calling were performed using CLC Genomics Workbench 6.5 (<http://www.clcbio.com>) using the default settings to *E. coli* Strain B REL606 (NCBI TaxID: 37762, 413997.3.PATRIC.ffn) or *S. mutants* UA159 (NCBI TaxID: 21007, 210007.7.PATRIC.ffn) downloaded from the PatricBRC database ([www.patricbrc.org](http://www.patricbrc.org)). An average coverage of 1800X was obtained for the *E. coli* genomes and of 5000X for *S. mutants*. Sequences were deposited in the NCBI Short read Archive (SRA) under SRX1144572.

### *Plasmid construction*

The IleRS gene from *S. cerevisiae* was PCR amplified from a cDNA clone (Openbiosystems) as *PciI/XhoI* fragment, introducing a C-terminal His6 tag via the reverse primer, and inserted into pET15b cut with *NcoI/XhoI*. The original His6 tag from the vector was removed using this cloning strategy. The IleRS genes from both *Saccharomyces cerevisiae* and *Bacillus subtilis* were subcloned from plasmids pET.ScIleRS and pET.BsIleRS. pET.ScIleRS was digested with *SphI* and *HindIII* and the fragment containing the IleRS gene (*ileS*) was ligated into pBAD18 cut with *SphI* and *HindIII* creating pBY324.10. pET.BsIleRS was digested with *XbaI* and *XhoI* and the fragment containing *ileS* was ligated into pBAD18 cut with *XbaI* and

*SalI* creating pBY326.6. *Mycobacterium tuberculosis ileS* was amplified by PCR from *M. tuberculosis* H37Ra (ATCC 2577D-5) genomic DNA using oligos BAD33IleRSMtB.ol1 and BAD33IleRSMtB.ol2. The PCR fragment and pBAD33 were digested with *XbaI* and *HindIII* before ligation creating pBY227.1. All three inserts were verified by sequencing using plasmid specific primers BADO15 and BADRev2. pPCT080 was created by disrupting the kanamycin resistance cassette of p*MmPair* with chloramphenicol resistance cassette from pKD3.

## References

- Allali-Hassani, A., T.L. Campbell, A. Ho, J.W. Schertzer & E.D. Brown, (2004) Probing the active site of YjeE: a vital *Escherichia coli* protein of unknown function. *Biochem J* **384**: 577-584.
- Baba, T., T. Ara, M. Hasegawa, Y. Takai, Y. Okumura, M. Baba, K.A. Datsenko, M. Tomita, B.L. Wanner & H. Mori, (2006) Construction of *Escherichia coli* K-12 in-frame, single-gene knockout mutants: the Keio collection. *Mol Syst Biol* **2**: 2006 0008.
- Bitoun, J.P., S. Liao, G.G. Xie, W.L. Beatty & Z.T. Wen, (2014) Deficiency of BrpB causes major defects in cell division, stress responses and biofilm formation by *Streptococcus mutans*. *Microbiology* **160**: 67-78.
- Bohlke, N. & N. Budisa, (2014) Sense codon emancipation for proteome-wide incorporation of noncanonical amino acids: rare isoleucine codon AUA as a target for genetic code expansion. *FEMS Microbiol Lett* **351**: 133-144.
- Brosius, J. & A. Holy, (1984) Regulation of ribosomal RNA promoters with a synthetic lac operator. *Proc Natl Acad Sci U S A* **81**: 6929-6933.
- Campbell, T.L., C.S. Ederer, A. Allali-Hassani & E.D. Brown, (2007) Isolation of the *rstA* gene as a multicopy suppressor of YjeE, an essential ATPase of unknown function in *Escherichia coli*. *J Bacteriol* **189**: 3318-3321.
- Daegelen, P., F.W. Studier, R.E. Lenski, S. Cure & J.F. Kim, (2009) Tracing ancestors and relatives of *Escherichia coli* B, and the derivation of B strains REL606 and BL21(DE3). *J Mol Biol* **394**: 634-643.
- El Yacoubi, B., I. Hatin, C. Deutsch, T. Kahveci, J.P. Rousset, D. Iwata-Reuyl, A.G. Murzin & V. de Crécy Lagard, (2011) A role for the universal Kae1/Qri7/YgjD (COG0533) family in tRNA modification. *Embo J* **30**: 882-893.
- El Yacoubi, B., B. Lyons, Y. Cruz, R. Reddy, B. Nordin, F. Agnelli, J.R. Williamson, P. Schimmel, M.A. Swairjo & V. de Crécy-Lagard, (2009) The universal YrdC/Sua5 family is required for the formation of threonylcarbamoyladenine in tRNA. *Nucleic Acids Res* **37**: 2894-2909.
- Gerdes, S., B. El Yacoubi, M. Bailly, I.K. Blaby, C.E. Blaby-Haas, L. Jeanguenin, A. Lara-Núñez, A. Pribat, J.C. Waller, A. Wilke, R. Overbeek, A.D. Hanson & V. de Crécy



- Lagard, (2011) Synergistic use of plant-prokaryote comparative genomics for functional annotations. *BMC Genomics* **12**: S2-S2.
- Guzman, L.M., D. Belin, M.J. Carson & J. Beckwith, (1995) Tight regulation, modulation, and high-level expression by vectors containing the arabinose P<sub>BAD</sub> promoter. *J Bacteriol* **177**: 4121-4130.
- Handford, J.I., B. Ize, G. Buchanan, G.P. Butland, J. Greenblatt, A. Emili & T. Palmer, (2009) Conserved network of proteins essential for bacterial viability. *J Bacteriol* **191**: 4732-4749.
- Jühling, F., M. Mörl, R.K. Hartmann, M. Sprinzl, P.F. Stadler & J. Pütz, (2009) tRNAdb 2009: compilation of tRNA sequences and tRNA genes. *Nucleic Acids Res* **37**: D159-162.
- Kaczanowska, M. & M. Ryden-Aulin, (2004) Temperature sensitivity caused by mutant Release Factor 1 is suppressed by mutations that affect 16S rRNA Maturation. *J Bacteriol* **186**: 3046-3055.
- Kitagawa, M., T. Ara, M. Arifuzzaman, T. Ioka-Nakamichi, E. Inamoto, H. Toyonaga & H. Mori, (2006) Complete set of ORF clones of *Escherichia coli* ASKA library (A Complete Set of *E. coli* K-12 ORF Archive): Unique Resources for Biological Research. *DNA Res* **12**: 291-299.
- Onodera, T., K. Satoh, T. Ohta & I. Narumi, (2013) *Deinococcus radiodurans* YgjD and YeaZ are involved in the repair of DNA cross-links. *Extremophiles* **17**: 171-179.
- Oshima, T. & K. Imahori, (1974) Physicochemical properties of deoxyribonucleic acid from an extreme thermophile. *J Biochem* **75**: 179-183.
- Rath, D. & N. Jawali, (2006) Loss of expression of *cspC*, a cold shock family gene, confers a gain of fitness in *Escherichia coli* K-12 strains. *J Bacteriol* **188**: 6780-6785.
- Zuther, E., H. Schubert & M. Hagemann, (1998) Mutation of a gene encoding a putative glycoprotease leads to reduced salt tolerance, altered pigmentation, and cyanophycin accumulation in the cyanobacterium *Synechocystis* sp. strain PCC 6803. *J Bacteriol* **180**: 1715-1722.

## Supplemental Tables

Table S1: List of strains used in this study

| Strain           | Description                                                                                                                                                                                                      | Reference                                                            |
|------------------|------------------------------------------------------------------------------------------------------------------------------------------------------------------------------------------------------------------|----------------------------------------------------------------------|
| <i>E. coli</i>   |                                                                                                                                                                                                                  |                                                                      |
| C600             | F-, <i>thr-1</i> , <i>leuB6</i> (Am), <i>fhuA21</i> , <i>cyn-101</i> ?, <i>lacY1</i> , <i>glnX44</i> (AS), $\lambda^-$ , <i>rfbC1</i> , <i>glpR200</i> ( <i>glp<sup>c</sup></i> ), <i>thiE1</i>                  | CGSC                                                                 |
| <i>E. coli</i> B |                                                                                                                                                                                                                  |                                                                      |
| BW25113          | F-, <i>Ion-</i> , <i>dcm-</i> , <i>malB</i><br>F-, $\Delta$ ( <i>araD-araB</i> )567, $\Delta$ <i>lacZ</i> 4787(:: <i>rrnB</i> -3), $\lambda^-$ , <i>rph-1</i> , $\Delta$ ( <i>rhaD-rhaB</i> )568, <i>hsdR514</i> | CGSC<br>(Baba <i>et al.</i> , 2006)                                  |
| MG1655           | F- $\lambda$ - <i>ilvG-rfb-50 rph-1</i>                                                                                                                                                                          | CGSC                                                                 |
| VDC5684          | BW25113 P <sub>TET</sub> :: <i>tsaC</i> :: <i>aph</i>                                                                                                                                                            | (Gerdes <i>et al.</i> )                                              |
| VDC5801          | BW25113 P <sub>TET</sub> :: <i>tsaD</i> :: <i>aph</i>                                                                                                                                                            | (El Yacoubi <i>et al.</i> , 2011)                                    |
| VDC7061/62       | <i>E. coli</i> B P <sub>TET</sub> :: <i>tsaD</i> :: <i>aph</i>                                                                                                                                                   | This study                                                           |
| VDC7065/66       | <i>E. coli</i> B P <sub>TET</sub> :: <i>tsaC</i> :: <i>aph</i>                                                                                                                                                   | This study                                                           |
| VDC7069/70       | C600 P <sub>TET</sub> :: <i>tsaD</i> :: <i>aph</i>                                                                                                                                                               | This study                                                           |
| VDC7073/74       | C600 P <sub>TET</sub> :: <i>tsaC</i> :: <i>aph</i>                                                                                                                                                               | This study                                                           |
| US475            | <i>ara</i> $\Delta$ ( <i>gpt-lac</i> )5, <i>zcg-174</i> :: <i>Tn10</i> , <i>gyrA</i> ( <i>nalA</i> ), <i>arg</i> (UAG), <i>rpoB</i> ( <i>rif</i> ), <i>thi</i>                                                   | (Kaczanowska & Ryden-Aulin, 2004).                                   |
| US477            | US475, <i>prfA1 zcg-174</i> :: <i>Tn10</i>                                                                                                                                                                       | (Kaczanowska & Ryden-Aulin, 2004).                                   |
| MRA100           | US477, $\Delta$ <i>yrdC</i>                                                                                                                                                                                      | (Kaczanowska & Ryden-Aulin, 2004).                                   |
| JH19             | MC4100-A $\Delta$ <i>tsaBattB</i> ::( <i>araC</i> +P <sub>BAD</sub> : <i>tsaB</i> +); Kn <sup>r</sup>                                                                                                            | (Handford <i>et al.</i> , 2009)                                      |
| JH22             | MC4100-A $\Delta$ <i>tsaDattB</i> ::( <i>araC</i> +P <sub>BAD</sub> : <i>tsaD</i> +); Kn <sup>r</sup>                                                                                                            | (Handford <i>et al.</i> , 2009)                                      |
| EB444.6          | MG1655 <i>araBAD</i> :: <i>tsaE</i> :: <i>aph</i> $\Delta$ <i>tsaE</i> :: <i>cat</i> ; Kn <sup>r</sup> , Cm <sup>r</sup>                                                                                         | (Allali-Hassani <i>et al.</i> , 2004, Campbell <i>et al.</i> , 2007) |
| VDC9602          | MG1655 (pKK223-3); Ap <sup>r</sup>                                                                                                                                                                               | This study                                                           |
| VDC9603          | MG1655 (pRstA); Ap <sup>r</sup>                                                                                                                                                                                  | This study                                                           |
| VDC9604          | JH19 (pKK223-3); Kn <sup>r</sup> , Ap <sup>r</sup>                                                                                                                                                               | This study                                                           |
| VDC9605          | JH19 (pRstA); Kn <sup>r</sup> , Ap <sup>r</sup>                                                                                                                                                                  | This study                                                           |
| VDC9606          | JH22 (pKK223-3); Kn <sup>r</sup> , Ap <sup>r</sup>                                                                                                                                                               | This study                                                           |
| VDC9607          | JH22 (pRstA); Kn <sup>r</sup> , Ap <sup>r</sup>                                                                                                                                                                  | This study                                                           |
| VDC9608          | EB444.6 (pKK223-3); Kn <sup>r</sup> , Cm <sup>r</sup> , Ap <sup>r</sup>                                                                                                                                          | This study                                                           |
| VDC9609          | EB444.6 (pRstA); Kn <sup>r</sup> , Cm <sup>r</sup> , Ap <sup>r</sup>                                                                                                                                             | This study                                                           |

*D. radiodurans*

|                          |                                   |                                |
|--------------------------|-----------------------------------|--------------------------------|
| R1                       | Wild-type                         | (Onodera <i>et al.</i> , 2013) |
| XYD                      | R1, $\Delta tsaD$                 | (Onodera <i>et al.</i> , 2013) |
| XYZ                      | R1, $\Delta tsaB$                 | (Onodera <i>et al.</i> , 2013) |
| WDZ                      | R1, $\Delta tsaD$ , $\Delta tsaD$ | (Onodera <i>et al.</i> , 2013) |
| <i>S. mutans</i>         |                                   |                                |
| UA159                    | Wild-type                         | (Bitoun <i>et al.</i> , 2014)  |
| JB409                    | UA159, $\Delta tsaE$              | (Bitoun <i>et al.</i> , 2014)  |
| JB409c                   | JB409(pTsaE)                      | (Bitoun <i>et al.</i> , 2014)  |
| <i>Synechocystis</i> sp. |                                   |                                |
| PCC 6803                 | Wild-type                         | (Zuther <i>et al.</i> , 1998)  |
| gcp                      | PCC 6803, $tsaD::aphII$           | (Zuther <i>et al.</i> , 1998)  |
| <i>T. thermophilus</i>   |                                   |                                |
| HB8                      | Wild-type                         | (Oshima & Imahori, 1974)       |
| $\Delta TtTsaC$          | HB8, $\Delta tsaC::HTK$           | This study                     |

Table S2: Plasmids used in this study

| Plasmid Name          | Description                                                                                                                                                                                                            | Reference                         |
|-----------------------|------------------------------------------------------------------------------------------------------------------------------------------------------------------------------------------------------------------------|-----------------------------------|
| pBAD24                | Ap <sup>R</sup> , ColE1, arabinose inducible promoter                                                                                                                                                                  | (Guzman <i>et al.</i> )           |
| pBAD33                | Cm <sup>R</sup> , p15A, arabinose inducible promoter                                                                                                                                                                   | (Guzman <i>et al.</i> )           |
| pBAD18                | Ap <sup>R</sup> , ColE1, arabinose inducible promoter                                                                                                                                                                  | (Guzman <i>et al.</i> )           |
| pCA24N                | Cm <sup>R</sup> ; $lacI^q$                                                                                                                                                                                             | (Kitagawa <i>et al.</i> , 2006)   |
| pRstA <sub>ASKA</sub> | Cm <sup>R</sup> ; $lacI^q$ , P <sub>T5-lac</sub> :: <i>rstA</i>                                                                                                                                                        | (Kitagawa <i>et al.</i> , 2006)   |
| pKK223-3              | P <sub>lac</sub> ; Ap <sup>r</sup>                                                                                                                                                                                     | (Brosius & Holy, 1984)            |
| pBF9- <i>rstA</i>     | <i>rstA</i> gene from <i>E. coli</i> cloned in pBF9 (derivative of pKK223-3); <i>rstA</i> driven by P <sub>lac</sub> ; Ap <sup>r</sup>                                                                                 | (Campbell <i>et al.</i> , 2007)   |
| pyw <sub>lC</sub>     | pBAD24::yw <sub>lC</sub> from <i>B. subtilis</i>                                                                                                                                                                       | (El Yacoubi <i>et al.</i> , 2009) |
| pTsaD                 | pBAD:: <i>tsaD</i> from <i>E. coli</i>                                                                                                                                                                                 | (El Yacoubi <i>et al.</i> , 2011) |
| pNB26'2_MmPair        | <i>Mycoplasma mobile</i> □□□□□□□ <sup>3</sup> and <i>ileS</i> into pNB26'2 (Kan <sup>R</sup> , p15A, P <sub>LAC</sub> promoter)                                                                                        | (Bohlke & Budisa, 2014)           |
| pBY227.1              | pBAD33 carrying <i>ileS</i> from <i>Mycobacterium tuberculosis</i>                                                                                                                                                     | This study                        |
| pET.ScIIeRS           | <i>S. cerevisiae</i> was PCR amplified from a cDNA clone (Openbiosystems) as <i>PciI/XhoI</i> fragment, introducing a C-terminal His6 tag via the reverse primer, and inserted into pET15b cut with <i>NcoI/XhoI</i> . | This study                        |

|             |                                                                                                                                         |            |
|-------------|-----------------------------------------------------------------------------------------------------------------------------------------|------------|
| pET.BsIleRS | <i>ileS</i> from <i>B. subtilis</i> and ligated into pET15b                                                                             | This study |
| pBY324.10   | pBAD18 carrying <i>ileS</i> from <i>Saccharomyces cerevisiae</i>                                                                        | This study |
| pBY326.6    | pBAD18 carrying <i>ileS</i> from <i>Bacillus subtilis</i>                                                                               | This study |
| pPCT080     | pNB26'2_MmPair Klenow treated <i>PvuI</i> digest ligated with Klenow treated <i>XbaI</i> digested <i>cat</i> from pKD3; Cm <sup>r</sup> | This study |

*Table S3: Oligonucleotides used in the study*

| <b>Primer name</b>         | <b>Sequence</b>                                                 |
|----------------------------|-----------------------------------------------------------------|
| Dr_tRNA31-met_fwd          | GATATTGATGAACGTGCCGGACAG                                        |
| Dr_tRNA31-met_rev          | GAAACCTACCGCGAGGTCAT                                            |
| Dr_tRNA11-ile_fwd          | TAAGGGGTCAAGGCGAAACTTAG                                         |
| Dr_tRNA11-ile_rev          | GACGGAGTGGAAGACAGCTC                                            |
| Dr_tRNA41-met_fwd          | CAAGCTGATGGACGGCTAAAAAG                                         |
| Dr_tRNA41-met_rev          | GAACGTCCTGAGTCTGGCTTTG                                          |
| Dr_tRNA1-met_fwd           | ATTCAAGCAAATCTGGGGTAAAGC                                        |
| Dr_tRNA1-met_rev           | ACCCAGAAGAAAGTGGTGGTTC                                          |
| D-rad_TsaB_out-5'          | TTTGGCAATGTTTCGACATAGTGAG                                       |
| D-rad_TsaB_out-3'          | CAAGATTTTCGTTTCGGTGAAGGTG                                       |
| D-rad_TsaB_in-5'           | CCCTCTTTCTGTGACCCTCG                                            |
| D-rad_TsaB_in-3'           | CCTCATAGACCGCGCTATACAC                                          |
| D-rad_TsaD_out-5'          | GCGAGATCAGCGAGATTATCTTTG                                        |
| D-rad_TsaD_out-3'          | CTACCAGGACTTCAACACCCAG                                          |
| D-rad_TsaD_in-5'           | TCCTGGTCGCAGACGTTTCAC                                           |
| D-rad_TsaD_in-3'           | GTAAGGTGCTTGCAACTGCTC                                           |
| TTHA0793_Fw                | TCATGGCGCTCCGGATCTTGCCCCTTA                                     |
| TTHA0793_Rv                | GTTCGGGAGAACGAGCTTTATAGC                                        |
| TTHA0793_in_Fw             | GAAAGAGTATAACCAGGAAGCCCTG                                       |
| TTHA0793_in_Rv             | AAGGGCCTCCTTGGGGATCGCCCCTT                                      |
| FtRNA <sup>Ile</sup> (cat) | AATTCCTGCAGTAATACGACTCACTATAGGGCCCCTTAGCTC<br>AGTGGTTAGAGCAGGCG |
| RtRNA <sup>Ile</sup> (cat) | TGGTGGCCCCTGCTGGACTTGAACCAGCGACCAAGCGATTAT<br>GAGTCGCCTGCTCT    |
| RtRNA <sup>Ile</sup> (cat) | AATTCCTGCAGTAATACGACTCACTATAAGGCTTGTAGCTCA<br>GGTGGTTAGAGCGC    |
| RtRNA <sup>Ile</sup> (cat) | TGGTAGGCCTGAGTGGACTTGAACCACCGACCTCACCTTAT<br>CAGGGGTGCGCTCTAAC  |
| BAD33IleRSMtB.ol1          | ATATATTATTCTAGAGGAGTGAAACGATGACCGATAACGCAT<br>ATCCAAAG          |
| BAD33IleRSMtB.ol2          | AATTAATTAATTAAGCTTTTAGGTCTTTTCGATGCTTACCC                       |
| BAD015                     | AAGATTAGCGGATCCTACCTG                                           |
| BADRev2                    | TTCTGATTTATTCTGTATCAGGC                                         |
| Ptet2771-fwd               | ATAGGCGTATCACGAGGCC                                             |
| ygd661-rev                 | GGTGCCGTTGTCACGAATGGT                                           |
| yrdC573-rev                | TTACCCCTGTGCGAAACAGTTCA                                         |

Table S4. List of proteins detected from mid-log phase growth, predicted fitness, and frequency of run of two or more ANN codons. (see Excel sheet)

Table S5. List of proteins detected from late-log phase growth, predicted fitness, and frequency of run of two or more ANN codons. (see Excel sheet)

Table S6. *D. radiodurans* ORFs with all Ser codons coded by AGY codons.

| <b>Gene</b> | <b>Annotation</b>                                                                   | <b>Length (AA)</b> |
|-------------|-------------------------------------------------------------------------------------|--------------------|
| DR_C0012    | transcriptional regulator, GerE family                                              | 59                 |
| DR_C0025    | chromosome partitioning protein, putative, ParA family                              | 74                 |
| DR_C0030    | hypothetical protein                                                                | 68                 |
| DR_0031     | FIG00577642: hypothetical protein                                                   | 80                 |
| DR_0175     | SSU ribosomal protein S9p (S16e)                                                    | 133                |
| DR_0207     | hypothetical protein                                                                | 47                 |
| DR_0208     | hypothetical protein                                                                | 130                |
| DR_0216     | Sulfur acceptor protein SufE for iron-sulfur cluster assembly                       | 147                |
| DR_0221     | DNA methylase, putative                                                             | 71                 |
| DR_0234     | Transcriptional regulator                                                           | 86                 |
| DR_0265     | Predicted transcriptional regulator of N-Acetylglucosamine utilization, GntR family | 190                |
| DR_0269     | FIG00577917: hypothetical protein                                                   | 322                |
| DR_0292     | Twin-arginine translocation protein TatA                                            | 117                |
| DR_0312     | LSU ribosomal protein L4p (L1e)                                                     | 205                |
| DR_0318     | LSU ribosomal protein L16p (L10e)                                                   | 141                |
| DR_0320     | SSU ribosomal protein S17p (S11e)                                                   | 96                 |
| DR_0322     | LSU ribosomal protein L24p (L26e)                                                   | 115                |
| DR_0328     | FIG01121178: hypothetical protein                                                   | 140                |
| DR_0331     | hypothetical protein                                                                | 66                 |
| DR_0338     | hypothetical protein                                                                | 57                 |
| DR_0341     | SSU ribosomal protein S15p (S13e)                                                   | 91                 |
| DR_0360     | hypothetical protein                                                                | 143                |
| DR_0381     | NADPH dependent preQ0 reductase-like                                                | 134                |
| DR_0476     | FIG013268: hypothetical protein                                                     | 103                |
| DR_0545     | hypothetical protein                                                                | 91                 |
| DR_0548     | Type IV pilin PilA                                                                  | 158                |
| DR_0586     | ATP-dependent Clp protease adaptor protein ClpS                                     | 113                |
| DR_0637     | hypothetical protein                                                                | 77                 |
| DR_0661     | Programmed cell death antitoxin YdcD                                                | 84                 |
| DR_0691     | hypothetical protein                                                                | 202                |
| DR_0734     | hypothetical protein                                                                | 72                 |
| DR_0780     | hypothetical protein                                                                | 92                 |
| DR_0800     | hypothetical protein                                                                | 60                 |

|         |                                                                                                                            |     |
|---------|----------------------------------------------------------------------------------------------------------------------------|-----|
| DR_0825 | LSU ribosomal protein L31p @ LSU ribosomal protein L31p, zinc-independent                                                  | 73  |
| DR_0865 | Peroxide stress regulator; Ferric uptake regulation protein; Fe <sup>2+</sup> /Zn <sup>2+</sup> uptake regulation proteins | 132 |
| DR_0877 | hypothetical protein                                                                                                       | 114 |
| DR_0909 | hypothetical protein                                                                                                       | 160 |
| DR_0955 | hypothetical protein                                                                                                       | 77  |
| DR_0993 | hypothetical protein                                                                                                       | 116 |
| DR_0994 | hypothetical protein                                                                                                       | 112 |
| DR_0995 | FIG00579650: hypothetical protein                                                                                          | 115 |
| DR_1004 | Quaternary ammonium compound-resistance protein SugE                                                                       | 96  |
| DR_1047 | hypothetical protein                                                                                                       | 68  |
| DR_1071 | hypothetical protein                                                                                                       | 105 |
| DR_1108 | hypothetical protein                                                                                                       | 146 |
| DR_1111 | transcriptional regulator, MerR family                                                                                     | 137 |
| DR_1134 | hypothetical protein                                                                                                       | 53  |
| DR_1162 | Transcription elongation factor GreA                                                                                       | 151 |
| DR_1204 | 4-carboxymuconolactone decarboxylase (EC 4.1.1.44)                                                                         | 132 |
| DR_1216 | hypothetical protein                                                                                                       | 156 |
| DR_1241 | hypothetical protein                                                                                                       | 71  |
| DR_1332 | hypothetical protein                                                                                                       | 132 |
| DR_1404 | hypothetical protein                                                                                                       | 73  |
| DR_1409 | hypothetical protein                                                                                                       | 382 |
| DR_1429 | FIG00579912: hypothetical protein                                                                                          | 57  |
| DR_1609 | Predicted 2-keto-4-pentenoate hydratase/2-oxohepta-3-ene-1,7-dioic acid hydratase                                          | 250 |
| DR_1663 | hypothetical protein                                                                                                       | 150 |
| DR_1676 | FIG00579720: hypothetical protein                                                                                          | 305 |
| DR_1686 | FIG00580334: hypothetical protein                                                                                          | 79  |
| DR_1737 | Signal peptidase I (EC 3.4.21.89)                                                                                          | 196 |
| DR_1739 | Transcriptional regulator, PadR family                                                                                     | 105 |
| DR_1776 | Nudix dNTPase DR1776 (EC 3.6.1.-)                                                                                          | 157 |
| DR_1806 | Nucleotidyltransferase (EC 2.7.7.-)                                                                                        | 74  |
| DR_1807 | Nucleotidyltransferase (EC 2.7.7.-)                                                                                        | 134 |
| DR_1816 | hypothetical protein                                                                                                       | 142 |
| DR_1844 | hypothetical protein                                                                                                       | 93  |
| DR_1847 | hypothetical protein                                                                                                       | 72  |
| DR_1904 | hypothetical protein                                                                                                       | 51  |
| DR_1942 | Acyl carrier protein                                                                                                       | 76  |
| DR_1954 | Transcriptional regulator, PadR family                                                                                     | 107 |
| DR_1957 | hypothetical protein                                                                                                       | 148 |
| DR_1968 | Oxygen-insensitive NAD(P)H nitroreductase (EC 1.-.-.-) / Dihydropteridine reductase (EC 1.5.1.34)                          | 212 |
| DR_2005 | LSU ribosomal protein L35p                                                                                                 | 66  |
| DR_2009 | KH domain RNA binding protein YlqC                                                                                         | 82  |
| DR_2030 | hypothetical protein                                                                                                       | 159 |

|          |                                                                      |     |
|----------|----------------------------------------------------------------------|-----|
| DR_2043  | LSU ribosomal protein L7/L12 (P1/P2)                                 | 122 |
| DR_2044  | LSU ribosomal protein L10p (P0)                                      | 169 |
| DR_2049  | LSU ribosomal protein L33p                                           | 55  |
| DR_2061  | hypothetical protein                                                 | 145 |
| DR_2079  | Transcriptional regulator, PadR family                               | 116 |
| DR_2085  | glutaredoxin, putative                                               | 81  |
| DR_2109  | SSU ribosomal protein S14p (S29e)                                    | 89  |
| DR_2114  | LSU ribosomal protein L30p (L7e)                                     | 55  |
| DR_2161  | protein-tyrosine phosphatase-related protein                         | 177 |
| DR_2165  | PaaD-like protein (DUF59) involved in Fe-S cluster assembly          | 106 |
| DR_2230  | hypothetical protein                                                 | 58  |
| DR_2247  | carbon monoxide dehydrogenase G protein                              | 153 |
| DR_2266  | hypothetical protein                                                 | 109 |
| DR_2273  | DNA topology modulation protein FlaR-related protein                 | 162 |
| DR_2292  | hypothetical protein                                                 | 70  |
| DR_2355  | GCN5-related N-acetyltransferase                                     | 154 |
| DR_2369  | hypothetical protein                                                 | 110 |
| DR_2378  | hypothetical protein                                                 | 64  |
| DR_2380  | FIG01230208: hypothetical protein                                    | 73  |
| DR_2456  | hypothetical protein                                                 | 57  |
| DR_2512  | Endoribonuclease L-PSP                                               | 125 |
| DR_2529  | hypothetical protein                                                 | 145 |
| DR_2534  | grpB protein                                                         | 111 |
| DR_2573  | hypothetical protein                                                 | 103 |
| DR_2580  | Iojax protein                                                        | 116 |
| DR_A0059 | Transcriptional regulator, PadR family                               | 182 |
| DR_A0077 | hypothetical protein                                                 | 142 |
| DR_A0095 | hypothetical protein                                                 | 130 |
| DR_A0102 | hypothetical protein                                                 | 106 |
| DR_A0165 | FIG00514740: hypothetical protein                                    | 134 |
| DR_A0167 | conserved protein                                                    | 183 |
| DR_A0267 | Formylmethanofuran dehydrogenase subunit E                           | 198 |
| DR_A0300 | hypothetical protein                                                 | 138 |
| DR_A0314 | Urease accessory protein UreE                                        | 114 |
| DR_A0319 | Urease beta subunit (EC 3.5.1.5) / Urease gamma subunit (EC 3.5.1.5) | 228 |

*Table S7. D. radiodurans ORFs with all Arg codons coded by AGR codons.*

| <b>PatricBRC Locus Tag</b> | <b>RefSeq Locus Tag</b> | <b>Annotation</b>    |
|----------------------------|-------------------------|----------------------|
| VBIDeiRad64572_1241        | DR_1045                 | hypothetical protein |
| VBIDeiRad64572_1529        |                         | hypothetical protein |
| VBIDeiRad64572_2039        |                         | hypothetical protein |
| VBIDeiRad64572_2919        |                         | hypothetical protein |

Table S8. *t<sup>6</sup>A* dependent codon usage of *D. radiodurans*. (see Excel sheet)

Table S9. *D. radiodurans* ORFs containing consecutive AUA codons.

| Gene     | Annotation                                            | Total number of repeated AUA | % of repeated AUA in protein | Fitness score <sup>#</sup> |
|----------|-------------------------------------------------------|------------------------------|------------------------------|----------------------------|
| DR_0664  | hypothetical protein                                  | 2                            | 1.2                          | 1                          |
| DR_0666  | transposase                                           | 2                            | 0.5                          | 1                          |
| DR_0709  | snoG protein                                          | 2                            | 0.7                          | 0.922                      |
| DR_0913  | hypothetical protein                                  | 2                            | 1.7                          | 1                          |
| DR_0978  | transposase                                           | 2                            | 0.5                          | 1                          |
| DR_1381  | transposase                                           | 2                            | 0.5                          | 1                          |
| DR_1593  | transposase                                           | 2                            | 0.5                          | 1                          |
| DR_1651  | transposase                                           | 2                            | 0.5                          | 1                          |
| DR_1655  | ABC transporter periplasmic substrate-binding protein | 2                            | 0.6                          | 1                          |
| DR_1933  | transposase                                           | 2                            | 0.5                          | 1                          |
| DR_2087  | translation initiation factor IF-3                    | 2                            | 0.9                          | 0.043                      |
| DR_2250  | methoxyneurosporene dehydrogenase                     | 2                            | 0.4                          | 1                          |
| DR_2301  | hypothetical protein                                  | 2                            | 0.9                          | 1                          |
| DR_2324  | transposase                                           | 2                            | 0.5                          | 1                          |
| DR_A0036 | hypothetical protein                                  | 2                            | 0.5                          | 1                          |
| DR_A0039 | mannosyltransferase                                   | 2                            | 0.6                          | 1                          |
| DR_A0172 | thiazole synthase                                     | 2                            | 0.7                          | 0.775                      |
| DR_B0084 | hypothetical protein                                  | 2                            | 3.0                          | ND                         |

# [http://cefg.uestc.edu.cn/ifim/data.php?id=NC\\_001263&strain=Deinococcus\\_radiodurans\\_R1&thread=1](http://cefg.uestc.edu.cn/ifim/data.php?id=NC_001263&strain=Deinococcus_radiodurans_R1&thread=1) and

[http://cefg.uestc.edu.cn/ifim/data.php?id=NC\\_001264&strain=Deinococcus\\_radiodurans\\_R1&thread=1](http://cefg.uestc.edu.cn/ifim/data.php?id=NC_001264&strain=Deinococcus_radiodurans_R1&thread=1)

A score < 0.65

ND: not determined

Table S10. Essential genes in *E. coli* with runs of two or more AUA codons

| RefSeq Locus Tag | Function                                                   | Gene | Length of AUA Repeat | Number of Occurrences of Repeat |
|------------------|------------------------------------------------------------|------|----------------------|---------------------------------|
| b4261            | LPS export ABC transporter permease                        | LptF | 2                    | 1                               |
| b1740            | NAD synthase ammonia dependent                             | NadE | 2                    | 1                               |
| b3973            | Bifunctional biotin protein ligase biotin operon repressor | BirA | 2                    | 1                               |



*Table S11. Essential genes in E. coli with runs of two or more AUU codons*

| <b>RefSeq Locus Tag</b> | <b>Function</b>                                                | <b>Gene</b> | <b>Length of AUU Repeat</b> | <b>Number of Occurrences of repeat</b> |
|-------------------------|----------------------------------------------------------------|-------------|-----------------------------|----------------------------------------|
| b3250                   | Cell division and growth                                       | MreC        | 3                           | 1                                      |
| b1912                   | Phosphatidylglycerophosphate synthase                          | PgsA        | 3                           | 1                                      |
| b3176                   | Phosphoglucosamine mutase                                      | GlmM        | 3                           | 1                                      |
| b0886                   | Glutathione/cysteine ABC transporter permease/ATPase           | CydC        | 2                           | 1                                      |
| b4261                   | LPS export ABC transporter permease                            | LptF        | 2                           | 1                                      |
| b1876                   | Glutathione/cysteine ABC transporter permease/ATPase           | CydC        | 2                           | 1                                      |
| b0657                   | Arginine--tRNA ligase                                          | ArgS        | 2                           | 1                                      |
| b0526                   | Apolipoprotein N-acyltransferase                               | Lnt         | 2                           | 1                                      |
| b4052                   | Cysteine--tRNA ligase                                          | CysS        | 2                           | 1                                      |
| b2563                   | Replicative DNA helicase                                       | DnaB        | 2                           | 1                                      |
| b2315                   | ACP-CoA phosphopantetheinyltransferase                         | AcpS        | 2                           | 1                                      |
| b0529                   | Dihydrofolate:folylpolyglutamate synthase                      | FolC        | 2                           | 1                                      |
| b0172                   | Methenyltetrahydrofolate dehydrogenase/cyclohydrolase          | FolD        | 2                           | 1                                      |
| b3463                   | Ribosome recycling factor (RRF)                                | Frr         | 2                           | 1                                      |
| b3805                   | Cell division ATP-binding protein                              | FtsE        | 2                           | 1                                      |
| b0154                   | Porphobilinogen deaminase                                      | HemC        | 2                           | 1                                      |
| b0918                   | Glutamate-1-semialdehyde aminomutase                           | HemL        | 2                           | 1                                      |
| b1175                   | 3-deoxy-manno-octulosonate cytidyltransferase                  | KdsB        | 2                           | 1                                      |
| b1174                   | Inhibitor of FtsZ ring polymerization                          | MinD        | 2                           | 2                                      |
| b0087                   | Blocks MinCD inhibition of FtsZ polymerization at cell center  | MinE        | 2                           | 1                                      |
| b3249                   | UDP-N-acetylmuramoyl-pentapeptide:undecaprenyl-PO4 phosphatase | MraY        | 2                           | 1                                      |
| b0085                   | Mecillinam resistance                                          | MreD        | 2                           | 1                                      |
| b0086                   | meso-diaminopimelate adding enzyme                             | MurE        | 2                           | 2                                      |
| b3300                   | D-alanyl:D-alanine adding enzyme                               | MurF        | 2                           | 1                                      |
| b2585                   | SecYEG inner membrane translocon core subunit                  | SecY        | 2                           | 1                                      |
| b3783                   | Phosphatidylserine synthase                                    | PssA        | 2                           | 1                                      |
| b3320                   | Transcription termination factor Rho                           | Rho         | 2                           | 1                                      |
| b2606                   | 50S ribosomal subunit protein L3                               | RplC        | 2                           | 1                                      |
| b3318                   | 50S ribosomal subunit protein L19                              | RplS        | 2                           | 1                                      |
| b0098                   | 50S ribosomal subunit protein L23                              | RplW        | 2                           | 1                                      |

|       |                                                                                                      |      |   |   |
|-------|------------------------------------------------------------------------------------------------------|------|---|---|
| b3648 | Preprotein translocase secAYEG receptor/ATPase subunit                                               | SecA | 2 | 1 |
| b3705 | Guanylate kinase                                                                                     | Gmk  | 2 | 1 |
| b3288 | Membrane protein insertase                                                                           | YidC | 2 | 1 |
| b3189 | Methionyl-tRNA formyltransferase                                                                     | Fmt  | 2 | 1 |
| b4040 | UDP-N-acetylglucosamine enoylpyruvyl transferase                                                     | MurA | 2 | 1 |
| b3018 | 4-Hydroxybenzoate polyprenyltransferase                                                              | UbiA | 2 | 1 |
| b3623 | 1-Acyl-n-glycerol-3-phosphate acyltransferase                                                        | PlsC | 2 | 2 |
| b3793 | Adds terminal GlcNac side branch to the lipopolysaccharide core prior to attachment of the O antigen | WaaU | 2 | 2 |
| b3201 | Wzy protein involved in ECA polysaccharide chain elongation                                          | WzyE | 2 | 1 |
| b4084 | LPS export ABC transporter ATPase                                                                    | LptB | 2 | 1 |
| b2615 | D-allose kinase                                                                                      | AlsK | 2 | 1 |
| b0103 | ATP-NAD kinase                                                                                       | NadK | 2 | 1 |
| b0176 | Dephospho-CoA kinase                                                                                 | CoaE | 2 | 1 |
| b4162 | Inner membrane zinc RIP metalloprotease                                                              | RseP | 2 | 2 |
| b3183 | 3' to 5' oligoribonuclease                                                                           | Orn  | 2 | 1 |
| b0890 | DNA-binding GTPase involved in cell partitioning and DNA repair                                      | ObgE | 2 | 1 |
| b2949 | DNA translocase at septal ring sorting daughter chromosomes                                          | FtsK | 2 | 1 |
| b0174 | Putative anti-termination factor for Rho-dependent terminators                                       | YqgF | 2 | 1 |
| b1116 | Undecaprenyl pyrophosphate synthase                                                                  | IspU | 2 | 1 |
| b1118 | LolA-dependent release of lipoproteins from inner membrane                                           | LolC | 2 | 1 |

*Table S12. Essential genes in E. coli with runs of two or more AUC codons*

| <b>RefSeq Locus Tag</b> | <b>Function</b>                                             | <b>Gene</b> | <b>Length of AUC Repeat</b> | <b>Number of occurrences of repeat</b> | <b>Length of AUC Repeat</b> | <b>Number of occurrences of repeat</b> |
|-------------------------|-------------------------------------------------------------|-------------|-----------------------------|----------------------------------------|-----------------------------|----------------------------------------|
| b3793                   | Wzy protein involved in ECA polysaccharide chain elongation | WzyE        | 2                           | 1                                      | 3                           | 1                                      |
| b3705                   | Membrane protein insertase                                  | YidC        | 3                           | 1                                      |                             |                                        |
| b1876                   | Arginine--tRNA ligase                                       | ArgS        | 2                           | 1                                      |                             |                                        |
| b3433                   | Aspartate semialdehyde dehydrogenase                        | Asd         | 2                           | 1                                      |                             |                                        |
| b1866                   | Aspartate--tRNA ligase                                      | AspS        | 2                           | 2                                      |                             |                                        |

|       |                                                           |      |   |   |
|-------|-----------------------------------------------------------|------|---|---|
| b0657 | Apolipoprotein N-acyltransferase                          | Lnt  | 2 | 1 |
| b0733 | Cytochrome d (bd-I) ubiquinol oxidase subunit 1           | CydA | 2 | 1 |
| b0526 | Cysteine--tRNA ligase                                     | CysS | 2 | 1 |
| b4052 | Replicative DNA helicase                                  | DnaB | 2 | 1 |
| b2779 | Enolase                                                   | Eno  | 2 | 3 |
| b2566 | Ribosome-associated GTPase essential for growth           | Era  | 2 | 1 |
| b0048 | Dihydrofolate reductase                                   | FolA | 2 | 1 |
| b0093 | Divisome assembly protein                                 | FtsQ | 2 | 1 |
| b0089 | Putative lipid II flippase                                | FtsW | 2 | 1 |
| b3340 | Elongation Factor EF-G                                    | FusA | 2 | 4 |
| b2515 | 1-hydroxy-2-methyl-2-(E)-butenyl 4-diphosphate synthase   | IspG | 2 | 1 |
| b3729 | Glucosamine-6-phosphate synthase                          | GlmS | 2 | 2 |
| b0680 | Glutamine--tRNA ligase                                    | GlnS | 2 | 1 |
| b0154 | Glutamate-1-semialdehyde aminomutase                      | HemL | 2 | 2 |
| b0026 | Isoleucine--tRNA ligase                                   | IleS | 2 | 5 |
| b3168 | Translation initiation factor IF-2                        | InfB | 2 | 2 |
| b0918 | 3-deoxy-manno-octulosonate cytidyltransferase             | KdsB | 2 | 1 |
| b2942 | S-adenosylmethionine synthase                             | MetK | 2 | 1 |
| b4143 | Chaperonin Cpn60                                          | GroL | 2 | 3 |
| b3251 | Cell wall structural actin-like protein in MreBCD complex | MreB | 2 | 1 |
| b0085 | meso-diaminopimelate adding enzyme                        | MurE | 2 | 1 |
| b3169 | Transcription termination/antitermination L factor        | NusA | 2 | 1 |
| b4041 | Glycerol-3-phosphate                                      | PlsB | 2 | 1 |

|       |                                                            |      |   |   |
|-------|------------------------------------------------------------|------|---|---|
|       | acyltransferase                                            |      |   |   |
| b3863 | DNA polymerase I                                           | PolA | 2 | 1 |
| b3300 | SecYEG inner<br>membrane translocon<br>core subunit        | SecY | 2 | 1 |
| b1207 | Phosphoribosylpyrophosphate synthase                       | Prs  | 2 | 3 |
| b2585 | Phosphatidylserine synthase                                | PssA | 2 | 1 |
| b1204 | Peptidyl-tRNA hydrolase                                    | Pth  | 2 | 1 |
| b2780 | CTP synthase                                               | PyrG | 2 | 1 |
| b3319 | 50S ribosomal subunit protein L4                           | RplD | 2 | 1 |
| b3308 | 50S ribosomal subunit protein L5                           | RplE | 2 | 1 |
| b3231 | 50S ribosomal subunit protein L13                          | RplM | 2 | 1 |
| b3310 | 50S ribosomal subunit protein L14                          | RplN | 2 | 2 |
| b3294 | 50S ribosomal subunit protein L17                          | RplQ | 2 | 1 |
| b0169 | 30S ribosomal subunit protein S2                           | RpsB | 2 | 1 |
| b3303 | 30S ribosomal subunit protein S5                           | RpsE | 2 | 1 |
| b3307 | 30S ribosomal subunit protein S14                          | RpsN | 2 | 1 |
| b0098 | Preprotein translocase secAYEG receptor/ATPase subunit     | SecA | 2 | 3 |
| b0408 | SecDFyajC inner membrane secretion protein complex subunit | SecD | 2 | 2 |
| b0893 | Serine--tRNA ligase                                        | SerS | 2 | 2 |
| b2533 | Inositol-1-monophosphatase                                 | SuhB | 2 | 1 |
| b4258 | Valine--tRNA ligase                                        | ValS | 2 | 1 |
| b1092 | Malonyl-CoA-acyl carrier protein transacylase              | FabD | 2 | 1 |
| b4040 | 4-Hydroxybenzoate polyprenyltransferase                    | UbiA | 2 | 1 |
| b0915 | Lipid A 4' kinase                                          | LpxK | 2 | 2 |
| b3176 | Phosphoglucosamine                                         | GlmM | 2 | 1 |

|       |                                                                |      |   |   |
|-------|----------------------------------------------------------------|------|---|---|
|       | mutase                                                         |      |   |   |
| b4262 | LPS export ABC transporter permease                            | LptG | 2 | 1 |
| b3398 | Putative RcsCDB-response attenuator                            | Yrff | 2 | 1 |
| b2949 | Putative anti-termination factor for Rho-dependent terminators | YqgF | 2 | 1 |
| b1118 | LolA-dependent release of lipoproteins from inner membrane     | LolE | 2 | 1 |
| b1069 | Putative lipid II flippase                                     | MurJ | 2 | 1 |
| b2412 | FtsZ stabilizer                                                | ZipA | 2 | 1 |
| b2595 | TPR-repeat lipoprotein required for OM biogenesis              | BamD | 2 | 1 |
| b3185 | 50S ribosomal subunit protein L27                              | RpmA | 2 | 1 |

*Table S13. Synechocystis sp. PCC 6803 ORFs containing consecutive AUA codons.*

| <b>RefSeq Locus Tag</b> | <b>Function</b>                           | <b>Length of AUA repeat</b> | <b>Number of Occurrences of Repeat</b> |
|-------------------------|-------------------------------------------|-----------------------------|----------------------------------------|
| sll0092                 | Mobile element protein                    | 2                           | 3                                      |
| slr5029                 | Mobile element protein                    | 2                           | 3                                      |
| sll7002                 | Mobile element protein                    | 2                           | 3                                      |
| slr2036                 | RecD-like DNA helicase YrrC (Transposase) | 2                           | 2                                      |
| slr1210                 | hypothetical protein                      | 2                           | 2                                      |
| sll1780                 | RecD-like DNA helicase YrrC (Transposase) | 2                           | 2                                      |
| sll0842                 | Maltodextrin glucosidase (EC 3.2.1.20)    | 2                           | 2                                      |
| slr1243                 | hypothetical protein                      | 2                           | 2                                      |
| sll1997                 | RecD-like DNA helicase YrrC (Transposase) | 2                           | 2                                      |
| sll1255                 | RecD-like DNA helicase YrrC (Transposase) | 2                           | 2                                      |
| slr1682                 | Mobile element protein                    | 2                           | 2                                      |
| sll1560                 | RecD-like DNA helicase YrrC (Transposase) | 2                           | 2                                      |
| slr1635                 | RecD-like DNA helicase YrrC (Transposase) | 2                           | 2                                      |
| slr0180                 | RecD-like DNA helicase YrrC (Transposase) | 2                           | 2                                      |
| sll0315                 | RecD-like DNA helicase YrrC (Transposase) | 2                           | 2                                      |
| slr0468                 | hypothetical protein                      | 2                           | 2                                      |
| slr0913                 | hypothetical protein                      | 2                           | 2                                      |
| sll1474                 | RecD-like DNA helicase YrrC (Transposase) | 2                           | 2                                      |

|         |                                                                                                           |   |   |
|---------|-----------------------------------------------------------------------------------------------------------|---|---|
| sll5131 | RecD-like DNA helicase YrrC (Transposase)                                                                 | 2 | 2 |
| slr7008 | RecD-like DNA helicase YrrC (Transposase)                                                                 | 2 | 2 |
| slr6105 | RecD-like DNA helicase YrrC (Transposase)                                                                 | 2 | 2 |
| sll1408 | Transcriptional regulator, AraC family                                                                    | 2 | 1 |
| sll1401 | hypothetical protein                                                                                      | 2 | 1 |
| slr0727 | hypothetical protein                                                                                      | 2 | 1 |
| slr1063 | Dolichol-phosphate mannosyltransferase (EC 2.4.1.83)<br>in lipid-linked oligosaccharide synthesis cluster | 2 | 1 |
| slr1070 | Glycosyl transferase, family 2                                                                            | 2 | 1 |
| slr1042 | two-component system, regulatory protein                                                                  | 2 | 1 |
| ssl1920 | Mobile element protein                                                                                    | 2 | 1 |
| sll0986 | Mobile element protein                                                                                    | 2 | 1 |
| sll1582 | hypothetical protein                                                                                      | 2 | 1 |
| sll1571 | hypothetical protein                                                                                      | 2 | 1 |
| sll1820 | tRNA pseudouridine synthase A (EC 4.2.1.70)                                                               | 2 | 1 |
| ssr2009 | hypothetical protein                                                                                      | 2 | 1 |
|         | hypothetical protein                                                                                      | 2 | 1 |
| sll1716 | Mobile element protein                                                                                    | 2 | 1 |
|         | hypothetical protein                                                                                      | 2 | 1 |
| sll1765 | hypothetical protein                                                                                      | 2 | 1 |
| sll1710 | Mobile element protein                                                                                    | 2 | 1 |
| slr0265 | Mobile element protein                                                                                    | 2 | 1 |
| ssl0438 | 50S ribosomal protein L12 homologue                                                                       | 2 | 1 |
| slr2080 | hypothetical protein                                                                                      | 3 | 1 |
| sll1429 | putative                                                                                                  | 2 | 1 |
| slr2111 | hypothetical protein                                                                                      | 2 | 1 |
| slr2116 | hypothetical protein                                                                                      | 2 | 1 |
| sll1241 | hypothetical protein                                                                                      | 2 | 1 |
| sll1094 | hypothetical protein                                                                                      | 2 | 1 |
| slr1683 | Mobile element protein                                                                                    | 2 | 1 |
| sll1531 | FIG00560114: hypothetical protein                                                                         | 2 | 1 |
| sll0428 | Prolyl 4-hydroxylase, alpha subunit                                                                       | 2 | 1 |
| sll1861 | Mobile element protein                                                                                    | 2 | 1 |
| sll1860 | Mobile element protein                                                                                    | 2 | 1 |
| slr0350 | Mobile element protein                                                                                    | 2 | 1 |
| sll0012 | Mobile element protein                                                                                    | 2 | 1 |
| slr0222 | hypothetical protein                                                                                      | 2 | 1 |
| slr0574 | cytochrome P450                                                                                           | 2 | 1 |
| slr0511 | Mobile element protein                                                                                    | 2 | 1 |
| sll0677 | Mobile element protein                                                                                    | 2 | 1 |
| slr0703 | Mobile element protein                                                                                    | 2 | 1 |
| sll0665 | Mobile element protein                                                                                    | 2 | 1 |
| sll0664 | hypothetical protein                                                                                      | 2 | 1 |

|         |                                  |  |   |   |
|---------|----------------------------------|--|---|---|
| slr0666 | hypothetical protein             |  | 2 | 1 |
| slI0441 | hypothetical protein             |  | 2 | 1 |
| slI5083 | hypothetical protein             |  | 2 | 1 |
| slI5104 | Arsenate reductase (EC 1.20.4.1) |  | 2 | 1 |
| slI7031 | FIG032766: hypothetical protein  |  | 2 | 1 |
| slI7047 | hypothetical protein             |  | 2 | 1 |
| slr6013 | hypothetical protein             |  | 2 | 1 |
| slr6016 | hypothetical protein             |  | 2 | 1 |
| slr6037 | Arsenate reductase (EC 1.20.4.1) |  | 2 | 1 |
| slr6072 | hypothetical protein             |  | 2 | 1 |
| slr6075 | hypothetical protein             |  | 2 | 1 |
| slr6106 | hypothetical protein             |  | 2 | 1 |

*Table S14. S. mutans ORFs containing consecutive AUA codons.*

| RefSeq<br>Locus Tag | Function                                                                                           | Gene | Length<br>of ANN<br>repeat | Number of<br>Occurrences<br>of Repeat | Length<br>of ANN<br>repeat | Number of<br>Occurrences<br>of Repeat |
|---------------------|----------------------------------------------------------------------------------------------------|------|----------------------------|---------------------------------------|----------------------------|---------------------------------------|
| SMU.2033c           | FIG01116025: hypothetical protein                                                                  |      | 2                          | 2                                     | 3                          | 1                                     |
| SMU.02              | DNA polymerase III beta subunit (EC 2.7.7.7)                                                       | dnaN | 2                          | 1                                     |                            |                                       |
| SMU.09              | Ribosome-associated heat shock protein implicated in the recycling of the 50S subunit (S4 paralog) |      | 2                          | 1                                     |                            |                                       |
| SMU.46              | hypothetical protein                                                                               |      | 2                          | 1                                     |                            |                                       |
| SMU.52              | hypothetical protein                                                                               |      | 2                          | 1                                     |                            |                                       |
| SMU.117c            | FIG01118983: hypothetical protein                                                                  |      | 2                          | 1                                     |                            |                                       |
| SMU.156             | FIG01114029: hypothetical protein                                                                  |      | 2                          | 1                                     |                            |                                       |
| SMU.158             | CysteinyI-tRNA synthetase (EC 6.1.1.16)                                                            | cysS | 2                          | 1                                     |                            |                                       |
| SMU.191c            | Integrase                                                                                          |      | 2                          | 1                                     |                            |                                       |
| SMU.221c            | putative integrase                                                                                 |      | 2                          | 1                                     |                            |                                       |
| SMU.224c            | hypothetical protein                                                                               |      | 2                          | 1                                     |                            |                                       |
| SMU.239c            | FIG01115616: hypothetical protein                                                                  |      | 2                          | 2                                     |                            |                                       |
| SMU.246             | Undecaprenyl-phosphate N-acetylglucosaminyl 1-phosphate transferase (EC 2.7.8.-)                   | rgpG | 2                          | 1                                     |                            |                                       |
| SMU.255             | Oligopeptide ABC transporter, periplasmic oligopeptide-binding protein OppA (TC 3.A.1.5.1)         | oppA | 2                          | 1                                     |                            |                                       |
| SMU.286             | Competence-stimulating peptide ABC transporter ATP-binding protein ComA                            |      | 2                          | 1                                     |                            |                                       |
| SMU.343             | FIG01118487: hypothetical protein                                                                  |      | 2                          | 1                                     |                            |                                       |

|          |                                                                                                                                                                                                 |      |   |   |
|----------|-------------------------------------------------------------------------------------------------------------------------------------------------------------------------------------------------|------|---|---|
|          | protein                                                                                                                                                                                         |      |   |   |
| SMU.387  | YgjD/Kae1/Qri7 family, required for N6-threonylcarbamoyl adenosine t(6)A37 modification in tRNA                                                                                                 | tsaD | 2 | 1 |
| SMU.411c | Hypothetical protein in cluster with Ecs transporter (in Streptococci)                                                                                                                          |      | 2 | 1 |
| SMU.431  | Zinc ABC transporter, ATP-binding protein ZnuC                                                                                                                                                  |      | 2 | 1 |
| SMU.482  | 16S rRNA (cytosine(967)-C(5))-methyltransferase (EC 2.1.1.176)                                                                                                                                  | sunL | 2 | 1 |
| SMU.572  | Methylenetetrahydrofolate dehydrogenase (NADP+) (EC 1.5.1.5) / Methenyltetrahydrofolate cyclohydrolase (EC 3.5.4.9)                                                                             | folD | 2 | 1 |
| SMU.582  | Octaprenyl diphosphate synthase (EC 2.5.1.90) / Dimethylallyltransferase (EC 2.5.1.1) / (2E,6E)-farnesyl diphosphate synthase (EC 2.5.1.10) / Geranylgeranyl diphosphate synthase (EC 2.5.1.29) |      | 2 | 2 |
| SMU.640c | Transcriptional regulator, GntR family domain / Aspartate aminotransferase (EC 2.6.1.1)                                                                                                         |      | 2 | 1 |
| SMU.654  | Lantibiotic transport ATP-binding protein srtF                                                                                                                                                  | mutF | 2 | 1 |
| SMU.728  | putative oxidoreductase                                                                                                                                                                         |      | 2 | 1 |
| SMU.735  | FIG01118003: hypothetical protein                                                                                                                                                               |      | 2 | 1 |
| SMU.796  | FIG01119187: hypothetical protein                                                                                                                                                               |      | 2 | 1 |
| SMU.809  | Excinuclease ABC subunit B                                                                                                                                                                      | uvrB | 2 | 1 |
| SMU.820  | FIG01118636: hypothetical protein                                                                                                                                                               |      | 2 | 1 |
| SMU.832  | Glucosyltransferase (side chain biosynthesis) (EC 2.4.1.-)                                                                                                                                      |      | 2 | 1 |
| SMU.851  | NADH pyrophosphatase (EC 3.6.1.22)                                                                                                                                                              |      | 2 | 1 |
| SMU.864  | ABC transporter permease protein                                                                                                                                                                |      | 2 | 1 |
| SMU.876  | MSM (multiple sugar metabolism) operon regulatory protein                                                                                                                                       | msmR | 2 | 1 |
| SMU.905  | ABC transporter, ATP-binding/permease protein                                                                                                                                                   |      | 2 | 1 |
| SMU.939  | Isopentenyl-diphosphate delta-isomerase, FMN-dependent (EC 5.3.3.2)                                                                                                                             |      | 2 | 1 |
| SMU.947  | Dihydrofolate reductase (EC 1.5.1.3)                                                                                                                                                            | dfrA | 2 | 1 |
| SMU.988  | Cardiolipin synthetase (EC 2.7.8.-)                                                                                                                                                             |      | 2 | 1 |
| SMU.995  | Iron(III) dicitrate transport system                                                                                                                                                            |      | 2 | 1 |



|           |                                                                                          |       |   |   |
|-----------|------------------------------------------------------------------------------------------|-------|---|---|
|           | permease protein FecD (TC 3.A.1.14.1)                                                    |       |   |   |
| SMU.996   | Uncharacterized iron compound ABC uptake transporter, permease protein                   |       | 2 | 1 |
| SMU.1017  | Oxaloacetate decarboxylase beta chain (EC 4.1.1.3)                                       | oadB  | 2 | 1 |
| SMU.1027  | Transcriptional regulator, TetR family                                                   |       | 2 | 1 |
| SMU.1028  | alpha/beta hydrolase fold                                                                |       | 2 | 1 |
| SMU.1042  | ABC transporter permease protein                                                         |       | 2 | 1 |
| SMU.1044c | Similar to ribosomal large subunit pseudouridine synthase D, Bacillus subtilis YjbO type |       | 2 | 1 |
| SMU.1067c | putative ABC transporter, permease protein                                               |       | 2 | 1 |
| SMU.1102  | 6-phospho-beta-glucosidase (EC 3.2.1.86)                                                 | arb   | 2 | 1 |
| SMU.1129  | Two component system response regulator CiaR                                             | ciaR  | 2 | 1 |
| SMU.1150  | putative transporter, trans-membrane domain bacteriocin immunity protein                 |       | 3 | 1 |
| SMU.1160c | FIG01119470: hypothetical protein                                                        |       | 2 | 1 |
| SMU.1174  | ATP-dependent DNA helicase UvrD/PcrA                                                     | pcrA  | 2 | 1 |
| SMU.1235  | GTPase and tRNA-U34 5-formylation enzyme TrmE                                            | trmE  | 2 | 1 |
| SMU.1260c | Cell division initiation protein DivIVA                                                  |       | 2 | 1 |
| SMU.1262c | hypothetical protein                                                                     |       | 2 | 2 |
| SMU.1339  | Long-chain-fatty-acid--CoA ligase (EC 6.2.1.3)                                           | bacD  | 2 | 2 |
| SMU.1340  | putative bacitracin synthetase                                                           | bacA2 | 2 | 1 |
| SMU.1342  | Long-chain-fatty-acid--CoA ligase (EC 6.2.1.3)                                           | bacA1 | 2 | 2 |
| SMU.1346  | Thioesterase                                                                             | bacT  | 2 | 1 |
| SMU.1456c | hypothetical protein                                                                     |       | 2 | 1 |
| SMU.1486c | Histidinol-phosphatase (EC 3.1.3.15)                                                     |       | 2 | 1 |
| SMU.1541  | Glycogen debranching enzyme (EC 3.2.1.-) / Pullulanase (EC 3.2.1.41)                     | pulA  | 2 | 1 |
| SMU.1550c | ABC transporter permease protein                                                         |       | 2 | 1 |
| SMU.1558c | Ribosomal-protein-S5p-alanine acetyltransferase                                          |       | 2 | 1 |
| SMU.1577c | hypothetical protein                                                                     |       | 2 | 1 |
| SMU.1611c | Multidrug resistance efflux pump PmrA                                                    |       | 2 | 1 |
| SMU.1661c | Signal peptidase-like protein                                                            |       | 2 | 1 |
| SMU.1679c | Phospholipid-binding protein                                                             |       | 2 | 1 |
| SMU.1692  | Pyruvate formate-lyase activating                                                        | pflA  | 2 | 1 |

|           |                                                                                                |      |   |   |  |
|-----------|------------------------------------------------------------------------------------------------|------|---|---|--|
|           | enzyme (EC 1.97.1.4)                                                                           |      |   |   |  |
| SMU.1714c | Tyrosine recombinase XerD                                                                      | xerD | 2 | 1 |  |
|           | hypothetical protein                                                                           |      | 2 | 1 |  |
| SMU.1810  | FIG01116767: hypothetical protein                                                              | scnE | 2 | 1 |  |
| SMU.1823  | Nicotinamidase (EC 3.5.1.19)                                                                   | pncA | 2 | 1 |  |
| SMU.1835  | Holo-[acyl-carrier protein] synthase (EC 2.7.8.7)                                              | acpS | 3 | 1 |  |
| SMU.1876  | Putative membrane protein precursor SPs0273                                                    |      | 2 | 1 |  |
| SMU.1881c | Competence-stimulating peptide ABC transporter ATP-binding protein ComA                        |      | 2 | 2 |  |
|           | Transposase                                                                                    |      | 2 | 1 |  |
| SMU.1916  | Histidine kinase of the competence regulon ComD                                                | comD | 2 | 1 |  |
| SMU.1926  | Transcriptional regulator, TetR family                                                         | psaR | 2 | 1 |  |
| SMU.1940c | Catalyzes the cleavage of p-aminobenzoyl-glutamate to p-aminobenzoate and glutamate, subunit A |      | 2 | 1 |  |
| SMU.2001  | DNA-directed RNA polymerase alpha subunit (EC 2.7.7.6)                                         | rpoA | 2 | 1 |  |
| SMU.2078c | Putative Holliday junction resolvase YqgF                                                      |      | 2 | 1 |  |

*Table S15. E. coli ORFs containing consecutive AUA codons.*

| RefSeq Locus Tag | Function                                                                                  | Gene | Length of AUA repeat | Number of Occurrences of Repeat |
|------------------|-------------------------------------------------------------------------------------------|------|----------------------|---------------------------------|
| b2213            | ADA regulatory protein / Methylated-DNA--protein-cysteine methyltransferase (EC 2.1.1.63) | ada  | 2                    | 1                               |
| b4494            | FIG00638086: hypothetical protein                                                         | arpB | 2                    | 1                               |
| b3739            | FIG048548: ATP synthase protein I2                                                        | atpI | 2                    | 1                               |
| b2901            | 6-phospho-beta-glucosidase (EC 3.2.1.86)                                                  | bglA | 2                    | 1                               |
| b3973            | Biotin operon repressor / Biotin-protein ligase (EC 6.3.4.15)                             | birA | 2                    | 1                               |
| b3911            | Copper sensory histidine kinase CpxA                                                      | cpxA | 2                    | 1                               |
| b0886            | Transport ATP-binding protein CydC                                                        | cydC | 2                    | 1                               |
| b4123            | C4-dicarboxylate transporter DcuB                                                         | dcuB | 2                    | 1                               |
| b1201            | Phosphoenolpyruvate-dihydroxyacetone phosphotransferase operon regulatory protein DhaR    | dhaR | 2                    | 1                               |
| b2269            | ElaD protein                                                                              | elaD | 2                    | 1                               |
| b2367            | Inner membrane component of tripartite multidrug resistance system                        | emrY | 3                    | 1                               |

|       |                                                                              |      |   |   |
|-------|------------------------------------------------------------------------------|------|---|---|
| b2370 | Hybrid sensory histidine kinase in two-component regulatory system with EvgA | evgS | 2 | 1 |
| b4317 | type 1 fimbriae anchoring protein FimD                                       | fimD | 2 | 1 |
| b1072 | Flagellar basal-body P-ring formation protein FlgA                           | flgA | 2 | 1 |
| b2321 | Cell division protein                                                        | flk  | 2 | 1 |
| b3447 | Gamma-glutamyltranspeptidase (EC 2.3.2.2)                                    | ggt  | 2 | 1 |
| b2975 | Glycolate permease                                                           | glcA | 2 | 1 |
| b3322 | PioO protein                                                                 | gspB | 2 | 1 |
| b2352 | putative ligase                                                              | gtrS | 2 | 1 |
| b3805 | Porphobilinogen deaminase (EC 2.5.1.61)                                      | hemC | 2 | 1 |
| b1579 | Integrase                                                                    | intQ | 2 | 1 |
| b1345 | Phage integrase                                                              | intR | 2 | 1 |
| b2289 | LysR family transcriptional regulator lrhA                                   | lrhA | 2 | 1 |
| b1159 | 5-methylcytosine-specific restriction enzyme A (EC 3.1.21.-)                 | mcrA | 2 | 1 |
| b4345 | enzyme; Degradation of DNA                                                   | mcrC | 2 | 1 |
| b1686 | Methionine ABC transporter ATP-binding protein                               | metN | 2 | 1 |
| b0199 | Molybdenum transport system permease protein ModB (TC 3.A.1.8.1)             | modB | 2 | 1 |
| b0764 | RelF inactive antibacterial toxin protein                                    | mokC | 2 | 1 |
| b0018 | NAD synthetase (EC 6.3.1.5)                                                  | nadE | 2 | 1 |
| b1740 | Nitrate/nitrite sensor protein (EC 2.7.3.-)                                  | narX | 2 | 1 |
| b1222 | Phenylacetate-coenzyme A ligase (EC 6.2.1.30) PaaF                           | paaK | 2 | 1 |
| b1398 | O-antigen ligase                                                             | rfaL | 2 | 1 |
| b3593 | Lipopolysaccharide core biosynthesis protein RfaS                            | rfaS | 2 | 1 |
| b0497 | core protein                                                                 | rhsA | 2 | 1 |
| b1822 | core protein                                                                 | rhsD | 2 | 1 |
| b1861 | Ribosomal RNA large subunit methyltransferase A (EC 2.1.1.51)                | rlmA | 2 | 1 |
| b2702 | Holliday junction DNA helicase RuvA                                          | ruvA | 2 | 1 |
| b3622 | PTS system, glucitol/sorbitol-specific IIC component (EC 2.7.1.69)           | srlA | 2 | 1 |
| b3629 | Colanic acid polymerase WcaD                                                 | wcaD | 2 | 1 |
| b2056 | FIG00638728: hypothetical protein                                            | yahL | 2 | 1 |
| b0326 | Putative uncharacterized protein YaiO                                        | yaiO | 2 | 1 |
| b0358 | Transcriptional regulator, AraC/XylS family                                  | ybcM | 2 | 1 |
| b0546 | Mobile element protein                                                       | ybfL | 2 | 1 |
| b0705 | FIG00638277: hypothetical protein                                            | ybhM | 2 | 1 |
| b0787 | Sensory box/GGDEF domain protein                                             | ycdT | 2 | 1 |
| b1025 | Putative hydrolase YcdX (EC 3.1.-.-)                                         | ycdX | 2 | 1 |

|       |                                                                                |      |   |   |
|-------|--------------------------------------------------------------------------------|------|---|---|
| b1034 | FIG00638073: hypothetical protein                                              | ycjD | 2 | 1 |
| b1289 | Putative oxidoreductase YcjS (EC 1.-.-.), NADH-binding                         | ycjS | 2 | 1 |
| b1315 | FIG00638289: hypothetical protein                                              | ydbD | 2 | 1 |
| b1407 | Mobile element protein                                                         | ydcC | 2 | 1 |
| b1460 | internalin, putative                                                           | yddK | 2 | 1 |
| b1471 | FIG002649: ydiI hotdog fold superfamily                                        | ydiI | 2 | 1 |
| b1690 | Putative transport system permease protein                                     | ydiM | 2 | 1 |
| b1697 | Electron transfer flavoprotein, beta subunit                                   | ydiQ | 2 | 1 |
| b1770 | Putative HTH-type transcriptional regulator YdjF                               | ydjF | 2 | 1 |
| b1730 | FIG00638395: hypothetical protein                                              | ydjO | 2 | 1 |
| b1834 | Paraquat-inducible protein B                                                   | yebT | 2 | 1 |
| b2273 | FIG00640159: hypothetical protein                                              | yfbN | 2 | 1 |
| b2362 | Eae protein                                                                    | yfdS | 2 | 1 |
| b2625 | Hyphothetical protein                                                          | yfjI | 2 | 1 |
| b2642 | FIG00638879: hypothetical protein                                              | yfjW | 3 | 2 |
| b4462 | Alpha-amylase (EC 3.2.1.1) (1,4-alpha-D-glucan glucanohydrolase) (GLYCOGENASE) | ygaQ | 2 | 1 |
| b2735 | Putative transcriptional regulator YgbI, DeoR family                           | ygbI | 2 | 1 |
| b2858 | ORF_f143                                                                       | ygeN | 2 | 1 |
| b2930 | Fructose-1,6-bisphosphatase, GlpX type (EC 3.1.3.11)                           | yggF | 2 | 1 |
| b3087 | Possible oxidoreductase                                                        | ygjR | 2 | 1 |
| b3173 | Outer-membrane protein yhbX precursor                                          | yhbX | 2 | 1 |
| b3484 | Mobile element protein                                                         | yhhI | 2 | 1 |
| b3442 | hypothetical protein                                                           | yhhZ | 2 | 2 |
| b3504 | FIG00641106: hypothetical protein                                              | yhiS | 2 | 1 |
| b3638 | DNA repair protein RadC                                                        | yicR | 2 | 1 |
| b3818 | FIG00640330: hypothetical protein                                              | yigG | 2 | 1 |
| b3861 | Putative GTP-binding protein                                                   | yihF | 2 | 1 |
| b4047 | FIG00639441: hypothetical protein                                              | yjbL | 2 | 1 |
| b4231 | Putative sugar ABC transport system, permease protein Yjff                     | yjff | 2 | 1 |
| b4365 | Putative regulator                                                             | yjjQ | 2 | 1 |
| b4567 | FIG00638078: hypothetical protein                                              | yjjZ | 2 | 1 |
| b1527 | FIG00638496: hypothetical protein                                              | yneK | 2 | 1 |
| b3013 | Uncharacterized protein yqhG precursor                                         | yqhG | 2 | 1 |

## Figures

**Figure S1**

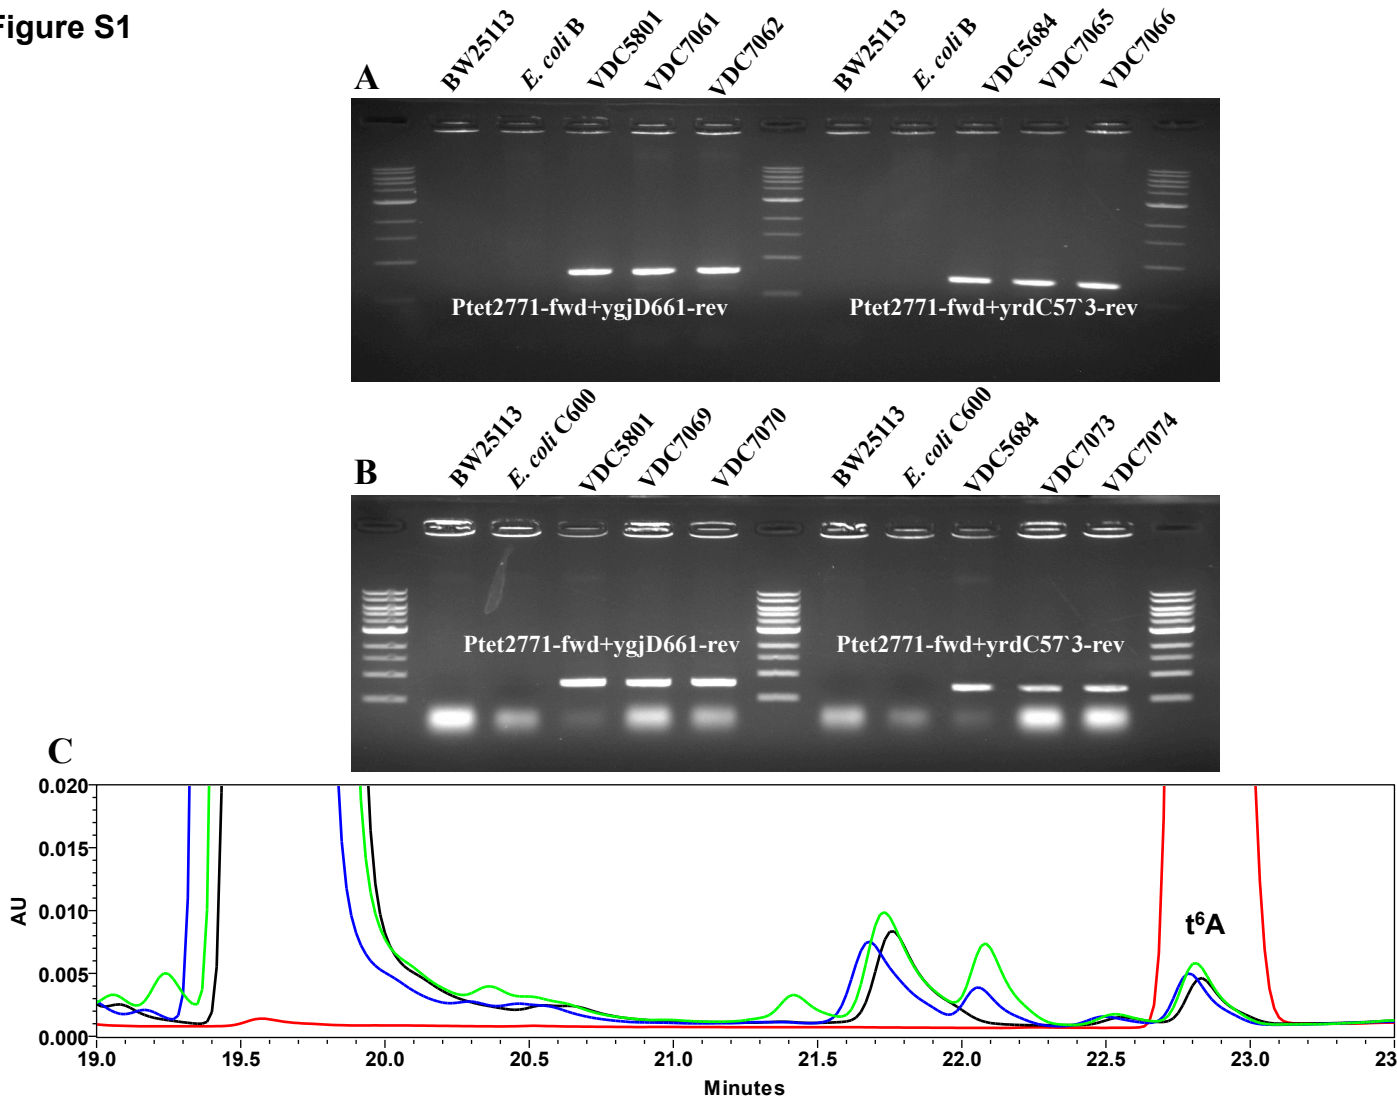

**Figure S1.** (A) PCR verification of P1 transduction from VDC5801 ( $P_{TET}::tsaD$ ) and VDC5684 ( $P_{TET}::tsaC$ ) into *E. coli* B. (B) PCR verification of P1 transduction from VDC5801 ( $P_{TET}::tsaD$ ) and VDC5684 ( $P_{TET}::tsaC$ ) into *E. coli* C600. The primer pairs used are indicated in the respective figure panels. (C) HPLC analysis of nucleosides in digests of tRNAs extracted from *E. coli* B (black line),  $P_{TET}::tsaD$  (VDC7062) (blue line) and  $P_{TET}::tsaC$  (VDC7066) (green line). Strains were grown in LB without the addition of the inducer aTc. Red line indicates t<sup>6</sup>A synthetic standard.

**Figure S2**

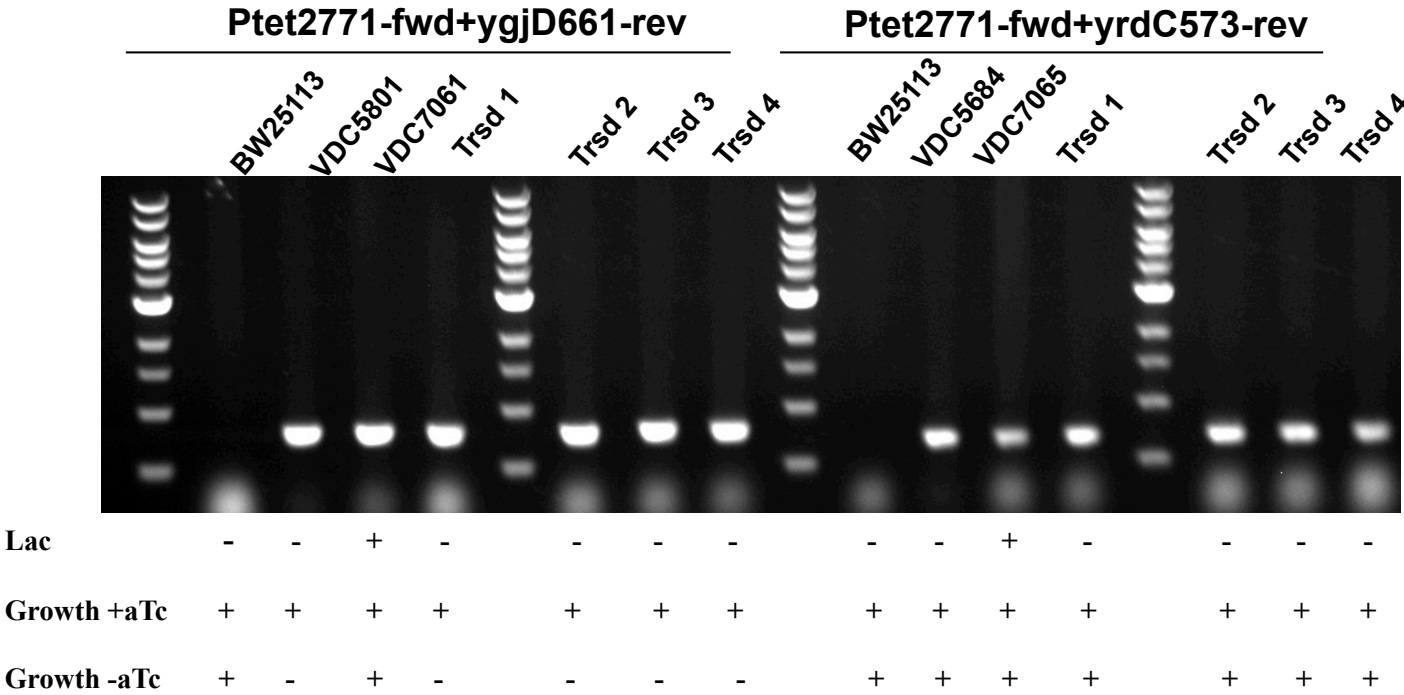

**Figure S2.** PCR verification of four independent clones (Trsd1-4) from P1 transduction from VDC7061 ( $P_{TET}::tsaD$  in *E. coli* B) and VDC7065 ( $P_{TET}::tsaC$  in *E. coli* B) back into *E. coli* BW25113. The primer pairs used are indicated on top of the respective figure panels. The growth phenotypes on LB +/- aTc and LB Xgal are reported below for each strain (donors are LacZ<sup>+</sup> and recipients and BW25113 are LacZ<sup>-</sup>). Four transductants of  $P_{TET}::tsaC$  back into BW25113 remained aTc independent, suggesting that mutations in the  $P_{TET}$  promoter made it constitutive.

# Figure S3

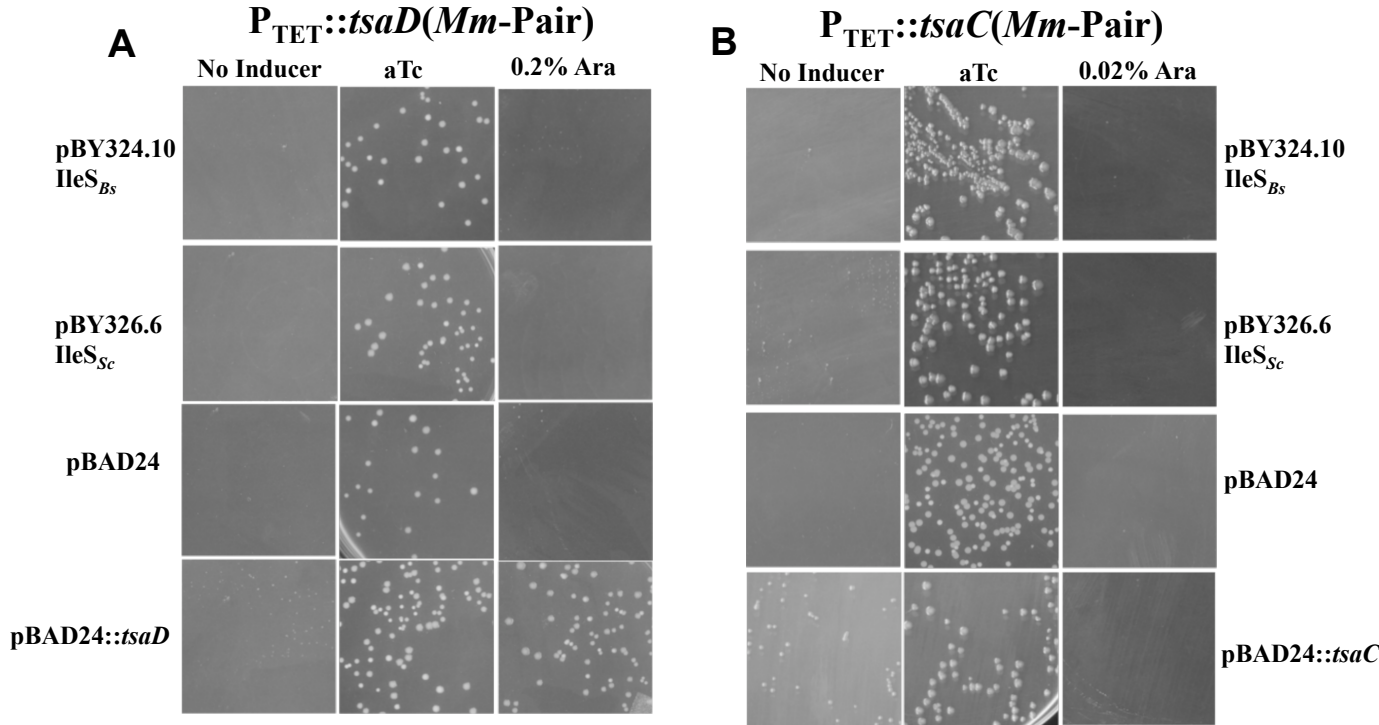

**Figure S3.** The  $t^6A$  essentiality phenotype of *E. coli* cannot be suppressed. *E. coli* strains  $P_{TET}::tsaD$  (A) and  $P_{TET}::tsaC$  (B) were equipped with a *Mycoplasma mobile* tRNA<sup>Ile3<sub>UAU</sub></sup>::IleRS pair (*Mm*-Pair). For complementation assays, cells were transformed with 100 ng of plasmid (pBY324.10 containing the *B. subtilis* IleRS gene, pBY326.6 containing the *S. cerevisiae* IleRS gene, pBAD24 or pBAD::tsaD) via electroporation, then recovered with 1 mL of LB and placed at 37°C for 1 hour with shaking. 200  $\mu$ L of cells were plated on LB supplemented with or without aTc (50 ng/ml) or arabinose.
